## Notes on Contributors

**Ayse Akalin** is an associate professor of sociology at Istanbul Technical University, Turkey. She received her doctorate from the City University of New York, Graduate Center. She is the author of the article “Motherhood as the Value of Labour: The Migrant Domestic Workers’ Market” (*Australian Feminist Studies* 30: 83) and “The Lie Which Is Not One: Biopolitics in the Migrant Domestic Workers’ Market in Turkey” (2015), which appeared as a chapter in *The Post-Fordist Sexual Contract: Working and Living in Contingency* (2016), edited by Lisa Adkins and Maryanne Dever. Her fields of interest include precarious labor, critical migration studies, and feminist theory.

**Moritz Altenried** is a doctoral candidate at Goldsmiths, University of London, and a research affiliate of the Digital Cultures Research Lab at the Centre for Digital Culture of Leuphana University Lüneburg. His areas of study include digital capitalism, labor, logistics, and migration.

**Paul Apostolidis** is Professor and Judge and Mrs. Timothy A. Paul Endowed Chair of Political Science at Whitman College as well as a professorial fellow at the Institute for Social Justice at Australian Catholic University. He is the author of a forthcoming book, tentatively titled *The Fight for Time: Migrant Day Laborers and the Politics of Precarity, Breaks in the Chain: What Immigrant Workers Can Teach America about Democracy* (2010), and *Stations of the Cross: Adorno and Christian Right Radio* (2000), and he is coeditor with Juliet Williams of *Public Affairs: Politics in the Age of Sex Scandals* (2004).

**Manuela Bojadžijev** is a professor at the Institute for Sociology and Cultural Organisation, Leuphana University Lüneburg, and a Member of the Berlin Institute for Integration and Migration Research at Humboldt University, Berlin. Her major publications include *Die windige Internationale* (2008; *The Windy International*), a monograph on the history of migration in relation to migrants’ practices of resistance and racism theory, and several coedited volumes.

**Deborah Cowen** is an associate professor in the Department of Geography and Planning at the University of Toronto. Her research interests include contested spaces; geographies of citizenship and labor; militarism, violence, and security; cities and social justice; and sub/urban politics. Cowen is most recently the author of *The Deadly Life of Logistics: Mapping Violence in Global Trade* (2014).

**Glenda Garelli** teaches at DePaul University. Garelli has most recently published, with Martina Tazzioli, *Tunisia as a Revolutionized Space of Migration* (2017).

**Nicholas De Genova** ([www.nicholasdegenova.com](http://www.nicholasdegenova.com)) is currently an independent scholar, based in Chicago. He most recently held a permanent appointment as a reader in urban geography and director of the spatial politics research group at King's College London. He previously held teaching appointments at Stanford, Columbia, and Goldsmiths, University of London, as well as visiting professorships or research positions at the Universities of Warwick, Bern, Amsterdam, and Chicago. He is the author of *Working the Boundaries: Race, Space, and "Illegality" in Mexican Chicago* (2005), coauthor of *Latino Crossings: Mexicans, Puerto Ricans, and the Politics of Race and Citizenship* (2003), editor of *Racial Transformations: Latinos and Asians Remaking the United States* (2006), coeditor of *The Deportation Regime: Sovereignty, Space, and the Freedom of Movement* (2010), and, most recently, editor of *The Borders of "Europe": Autonomy of Migration, Tactics of Bordering* (2017). He is currently writing two books, tentatively titled "The 'European' Question: Migration, Race, and Postcoloniality" and "The Migrant Metropolis."

**Verónica Gago** is a professor of social sciences at the University of Buenos Aires, a professor at the Instituto de Altos Estudios Sociales (IDAES), Universidad Nacional de San Martín, and a researcher at the National Council of Research (CONICET). She is the author of *Neoliberalism from Below: Popular Pragmatics and Baroque Economies* (2017). Her work is deeply influenced by active participation in the experience of Colectivo Situaciones.

**Leif Höfler** studied European ethnology at the Humboldt University of Berlin. Over the past two years, he has worked at the Berlin Institute for Integration and Migration Research, investigating political and social transformations in response to the German "refugee crisis," in particular, regarding the processes of labor market in/exclusion and the welcome movement for refugees.

**Serhat Karakayali** is a member of the Foundations of Migration and Integration Research department and an assistant professor in the Department for Diversity and Social Conflict at Humboldt University of Berlin. His core academic focus is on the political sociology of migration, historical and contemporary forms of illegal immigration, the practices and media of solidarity in immigration societies, and the transformation of integration policies.

**Sandro Mezzadra** teaches political theory at the University of Bologna and is an adjunct research fellow at the Institute for Culture and Society of Western Sydney University. He is currently a visiting professor at the New School for Social Research, New York City, in the Department of Politics. With Brett Neilson, he is the author of *Border as Method, or, the Multiplication of Labor* (2013).

**Brett Neilson** is a professor at the Institute for Culture and Society, Western Sydney University. He is currently working on the ARC Discovery project Logistics as Global Governance: Labour, Software and Infrastructure along the New Silk Road with partner researchers from Greece, India, Chile, Italy, Canada, and the UK. He is also working on a project titled Data Centres and the Governance of Labour and Territory with partner researchers from China, Singapore, Italy, the UK, and Germany. He is coauthor, with Sandro Mezzadra, of *Border as Method, or, the Multiplication of Labor* (2013).

**Rhacel Salazar Parreñas** is a professor of sociology and gender studies at the University of Southern California. Her research examines women's labor migration in economic globalization with a focus on the Philippines.

**Stephan Scheel** is currently a postdoctoral researcher and is working on two projects, one titled "ARIRHMUS: How Data Make a People" at the sociology department of Goldsmiths, University of London, and another titled "Processing Citizenship" in the Department of Science, Technology and Policy Studies at the University of Twente, Enschede, The Netherlands. His first monograph is forthcoming and is titled *Autonomy of Migration? Appropriating Mobility within Biometric Border Regimes*.

**Rachel Silvey** is a professor of geography and Charles Lee Director of the Asian Institute at the Munk School of Global Affairs at the University of Toronto. Her research focuses on gender, labor migration, culture and political geography, and critical development, specifically examining the case of Indonesia.

**Martina Tazzioli** is a lecturer in geography at Swansea University. She is the author of *Spaces of Governmentality: Autonomous Migration and the Arab Uprisings* (2014), coauthor with Glenda Garelli of *Tunisia as a Revolutionized Space of Migration* (2017), and coeditor of *Foucault and the History of Our Present* (2015). She is cofounder of the journal *Materialifoucaultian* and part of the editorial board of the journal *Radical Philosophy*.

**Nik Theodore** is a professor in the Department of Urban Planning and Policy, University of Illinois at Chicago and the editor in chief of *Antipode: A Radical Journal of Geography*. He coauthored (with Jamie Peck) *Fast Policy: Neoliberal Statecraft at the Thresholds of Neoliberalism* (2015) and edited (with Neil Brenner) *Spaces of Neoliberalism: Urban Restructuring in North America and Western Europe* (2002).

**Mira Wallis** studied political science at the Free University of Berlin and European ethnology at the Humboldt University of Berlin. Her research focuses on labor, mobility and rights, transformations of statehood, and solidarity movements. She recently worked as a research associate at the Berlin Institute for Integration and Migration Research on a project about volunteering for refugees in Germany.

DOI 10.1215/00382876-6822524
